# Supplementary material
Source: PubMed Central journal article supplement (PMC7166126)

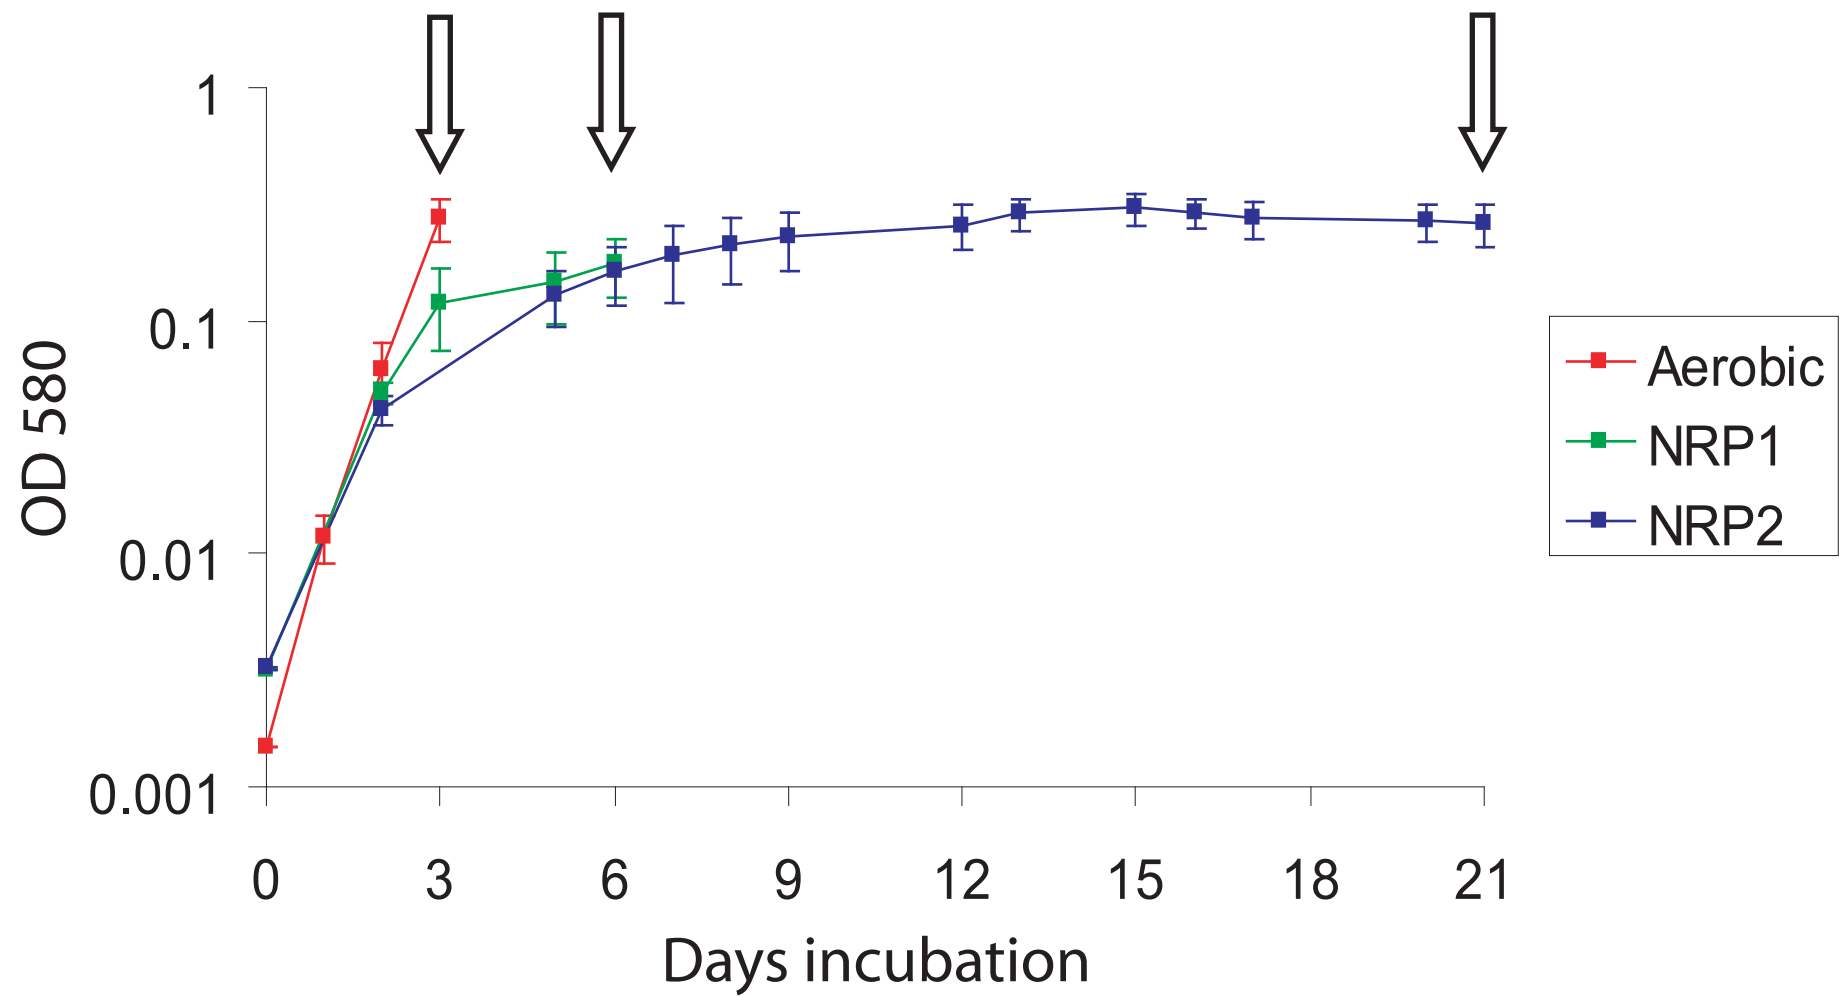

Supplement: EMS85854-supplement-Figure_S1.pdf [file EMS85854-supplement-Figure_S1.pdf]
